# Supplementary material for: Developmental Fluoride Neurotoxicity: A Systematic Review and Meta-Analysis
Source: PubMed Central journal article supplement (PMC3491930; doi:10.1289/ehp.1104912), 2012-07-20
Supplement: ehp.1104912.s001.pdf [file ehp.1104912.s001.pdf]

## **Supplemental Material**

### **Developmental Fluoride Neurotoxicity: A Systematic Review and Meta-Analysis**

Anna L Choi, Guifan Sun, Ying Zhang, Philippe Grandjean

## Supplemental Material, Table S1. Information on studies that were excluded

| Reference, Study location                 | No. in high exposure group | No. in reference group          | Age range (years) | Fluoride exposure        |                                                                                                               | Outcome Measure                                | Results                                                                                                                                                | Reason for Exclusion                                  |
|-------------------------------------------|----------------------------|---------------------------------|-------------------|--------------------------|---------------------------------------------------------------------------------------------------------------|------------------------------------------------|--------------------------------------------------------------------------------------------------------------------------------------------------------|-------------------------------------------------------|
|                                           |                            |                                 |                   | Assessment               | Range                                                                                                         |                                                |                                                                                                                                                        |                                                       |
| Liu et al. 2000<br>Tianjin, China         | 60                         | 58                              | 10-12             | Drinking water           | 3.15 mg/L (high)<br>0.37 mg/L (reference)                                                                     | CRT-RC <sup>a</sup>                            | Children in the high fluoride area scored significantly lower IQ scores than those in the control area                                                 | Duplicate study of Lu et al. 2000                     |
| Xu and Hu 1993<br>Ningxia, China          | 395                        | 608                             | 8-14              | Drinking water           | 1.8 mg/L (high)<br>0.8 mg/L (reference)                                                                       | Chinese Binet                                  | No effect of high fluoride levels on IQ                                                                                                                | Duplicate study of Xu and Hu in 1991                  |
| Calderon et al. 2000<br>Mexico            | 61 (total)                 | -                               | 6-8               | Drinking water;<br>Urine | 1.2-3 mg/L;<br>4.3 mgF/g creatinine                                                                           | WISC-RM, Rey Osterreith-Complex Figure;<br>CPT | Urinary F correlated positively with reaction time and inversely with visuospatial scores; IQ scores not influenced by fluoride exposure.              | Individual-level measure of exposure                  |
| Rocha-Amador et al. 2007<br>Mexico        | 132 (total)                | -                               | 6-10              | Drinking water;<br>Urine | 0.8-9.4 mg/L (means);<br>0.6-25 mg F/g creatinine                                                             | WISC-RM                                        | An inverse association between F (in urine and in drinking water) and performance, verbal, and full IQ scores                                          | Individual-level measure of exposure                  |
| Ding et al. 2011<br>Inner Mongolia, China | 331 (total)                | -                               | 7-14              | Drinking water;<br>Urine | 0.24-2.84 mg/L;<br>0.1-3.55 mg/L                                                                              | CRT-RC <sup>a</sup>                            | Urine fluoride was inversely associated with IQ in the multiple regression model                                                                       | Individual-level of exposure                          |
| Hu and Yu 1989<br>Shaanxi, China          | 198                        | 181                             | 6-14              | Drinking water           | 7ppm (high);<br><0.8ppm (reference)                                                                           | IQ (test not specified)                        | Effects of fluoride and IQ in children not specifically mentioned (but no effect of fluoride poisoning on intellectual ability in adults was reported) | Missing SDs in each group                             |
| Qin et al. 1990<br>Hebei, China           | 141 (high)                 | 147 (normal)<br>159 (reference) | 9-10.5            | Drinking water           | 2.1-4 mg/L (high)<br>0.5-1 mg/L (normal)<br>0.1-0.2 mg/L (reference)                                          | Raven                                          | Fluoride levels can disrupt intellectual development                                                                                                   | Missing mean (SD) of outcome measures                 |
| Xu and Hu 1991<br>Ningxia, China          | 395                        | 608                             | 7-17              | Drinking water           | 3.99 mg/L (high);<br>0.73 mg/L (reference)                                                                    | Chinese Binet                                  | No effect of high fluoride levels on IQ                                                                                                                | Missing SD of outcome measures                        |
| Li et al. 1993<br>Guizhou, China          | -                          | -                               | 8-13              | Coal burning             | 2.69(1.32) mg/L (high);<br>2.01(1.11) mg/L (normal);<br>1.81(0.33) mg/L (low);<br>1.02(0.13) mg/L (reference) | CRT-RC                                         | IQ scores were significantly lower among children in high and normal fluoride exposure areas than those in low and control areas                       | Missing number of subjects in each group              |
| Hao et al. 2002<br>Henan, China           | 1346                       | 1566                            | 8-12              | Drinking water           | 2.7-4.8 mg/L (high)<br><0.8 mg/L (reference)                                                                  | CRT-RC <sup>a</sup>                            | Children from high F areas scored lower IQ than those from the control area                                                                            | Missing mean(SD) of outcome measures                  |
| Wang et al. 2005<br>Guizhou, China        | 176                        | 50                              | 7-12              | Urine                    | >1.0-8.6 mg/L (high)<br>0.58-1.0 mg/L (reference)                                                             | Raven                                          | Children from the high fluoride group showed retarded development                                                                                      | Missing mean(SD) of outcome parameters                |
| Trivedi et al. 2007<br>India              | 89                         | 101                             | 12-13             | Drinking water;          | 5.55(0.42) mg/L (high);<br>2.01 (0.009) mg/L (reference)                                                      | IQ Questionnaire <sup>b</sup>                  | Children in the high fluoride area scored lower IQ than those from reference fluoride area                                                             | SDs of mean outcome parameter were questionably small |

<sup>a</sup>CRT-RC denotes Chinese Standardized Raven Test, rural version (Wang et al. 1989)

<sup>b</sup>Developed by Professor JH Shah (Desai K, Desai H. Psychological Measurement, Gujarat University Press, Gujarat State; India 1989)

## References

- Calderon J, Machado B, Navarro M, Carrizales L, Ortiz MD, Diaz-Barriga F. 2000. Influence of fluoride exposure on reaction time and visuospatial organization in children. *Epidemiol* 11(4):S153.
- Ding Y, Gao Y, Sun H, Han H, Wang W, Ji X, Liu X, Sun D. 2011. The relationships between low levels of urine fluoride on children's intelligence, dental fluorosis in endemic fluorosis areas in Hulunbuir, Inner Mongolia, China. 2011. *J Hazard Mater* 186:1942-1946.
- Hao K, Chen H, Zhu X. 2002. Research on the effect of high fluoride exposure on children's intelligence. *Henan Med Info*. 10(17):87. (in Chinese)
- Hu Y, Yu Z. 1989. Research on the intellectual ability of 6-14 year old students in an area with endemic fluoride poisoning. Collection of papers and abstracts of 4<sup>th</sup> China Fluoride Research Association. 6:73. Available online: <http://www.fluoridealert.org/chinese/>.
- Li SS, Ji JL, Kao YC. 1993. Comparison and analysis of the intelligence of children in different fluorosis communities. *Chinese J Control Endemic Dis* 8(6):372-373. (in Chinese)
- Liu S, Lu Y, Sun Z, Wu L, Lu W, Wang X, Song Y. 2000. Report on the intellectual ability of children living in high fluoride zones. *The Chinese Journal of Control of Endemic Disease*. 200. 15(4):231-232. (in Chinese) (Also available: *Fluoride* 33(2):74-78, which was included in the analysis).
- Qin L, Cui S, Chen R, Chang Y. 1990. Using the Raven's Standard Progressive Matrices to determine the effects of the level of fluoride in drinking water on the intellectual ability of school-age children. *Chinese J Control Endemic Dis* 5(4):203-204. Available online: <http://www.fluoridealert.org/chinese/>.
- Rocha-Amador D, Navarro ME, Carrizales L, Morales R, Calderon J. 2007. Decreased intelligence in children and exposure to fluoride and arsenic in drinking water. *Cad. Saúde Pública* 23 Suppl 4:S579-587.
- Trivedi MH, Verma RJ, Chinoy NJ, Patel RS, Sathawara NG. 2007. Effect of high fluoride water on intelligence of school children in India. *Fluoride* 40(3):178-183.

- Wang S, Zhang H, Fan W, Fang S, Kang P, Chen X, Yu M. 2005. The effects of endemic fluoride poisoning caused by coal burning on the physical development and intelligence of children. *J Appl Clin Pediatr* 20(9):897-899. (in Chinese) (Also available: *Fluoride* 41(4):344-348).
- Xu K, Hu X. 1991. The analysis of the effects of high fluoride exposure to children's physical and intellectual development. *J Ningxia Med Sch.* 13(4):19-22. (in Chinese)
- Xu K, Hu X. 1993. The analysis of the effects of high fluoride exposure to children's physical and intellectual development. *Endemic Dis Bull.* 8(2):92-95.

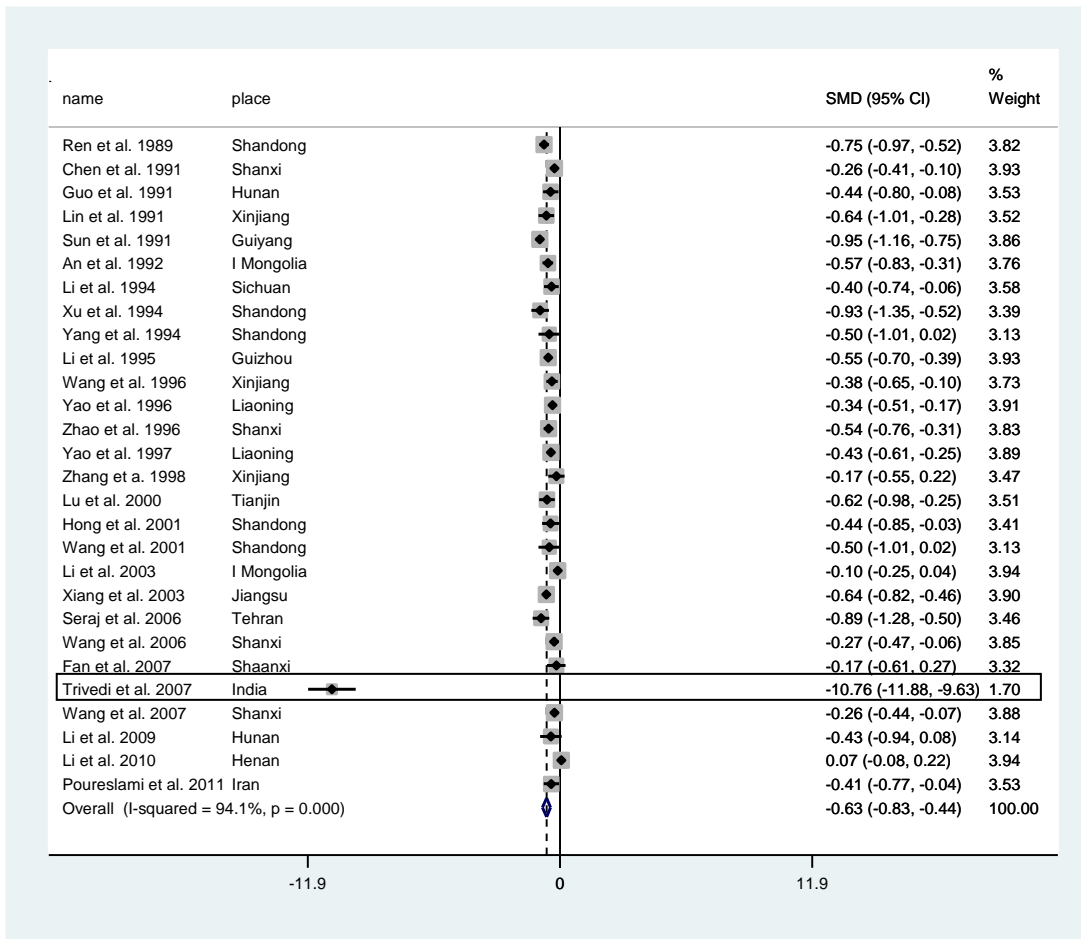

**Supplemental Material, Figure S1.** Random-effect SMD estimates and 95% CIs of child's intelligence score associated with high exposure to fluoride among 28 studies including Trivedi et al. 2007 with questionably small SDs (highlighted in a black textbox). SMDs for individual studies are shown as solid diamonds (◆), and the pooled SMD is shown as a non-filled diamond (◇). Horizontal lines represent 95% CIs for the study-specific SMDs.
